# Supplementary material for: Cobalt-doped cadmium selenide colloidal nanowires
Source: Royal Society of Chemistry journal article supplement (doi:10.1039/c1cc13467a), 2011-01-01
Supplement: c1cc13467a.pdf [file c1cc13467a.pdf]

## Supplementary Information

---

### Cobalt-doped cadmium selenide colloidal nanowires

Zhen Li,<sup>\*a</sup> Ai Jun Du,<sup>b</sup> Qiao Sun,<sup>b</sup> Muhsen Aljada,<sup>c</sup> Li Na Cheng,<sup>a</sup> Mark J Riley,<sup>d</sup> Zhong Hua Zhu,<sup>e</sup> Zhen Xiang Cheng,<sup>f</sup> Xiao Lin Wang,<sup>f</sup> Jeremy Hall,<sup>g</sup> Elmars Krausz,<sup>g</sup> Shi Zhang Qiao,<sup>a</sup> Sean C Smith,<sup>b</sup> Gao Qing (Max) Lu<sup>\*a</sup>

<sup>a</sup>ARC Center of Excellence for Functional Nanomaterials, Australian Institute for Bioengineering and Nanotechnology, The University of Queensland, QLD 4072, Australia; <sup>b</sup>Centre for Computational Molecular Science, Australian Institute for Bioengineering and Nanotechnology, The University of Queensland, QLD 4072, Australia; <sup>c</sup>Centre for Organic Photonics and Electronics, The University of Queensland, QLD 4072, Australia; <sup>d</sup>School of Chemistry and Molecular Biosciences, The University of Queensland, QLD 4072, Australia; <sup>e</sup>School of Chemical Engineering, The University of Queensland, QLD 4072, Australia; <sup>f</sup>Institute for Superconducting and Electronic Materials, The University of Wollongong, NSW 2522, Australia; <sup>g</sup>Research School of Chemistry, Australian National University, Canberra ACT 0200, Australia

\* To whom correspondence should be addressed. Email: [z.li3@uq.edu.au](mailto:z.li3@uq.edu.au), [m.lu@uq.edu.au](mailto:m.lu@uq.edu.au)

### **Preparation of undoped and doped CdSe colloidal nanowires:**

**Materials:** Cadmium oxide (CdO, 99.99 %), selenium powder (Se, 99 %), octanoic acid (OCA, 99 %), octyl ether (99 %) and phenyl ether (99 %) were purchased from Aldrich. Trioctylphosphine oxide (TOPO, 98 %) and trioctylphosphine (TOP, 90 %) were received from Merck and Fluka, respectively. Cobalt stearate (CoSt<sub>2</sub>) was ordered from Acros. Bismuth (Bi) nanoparticles were prepared according to previous reports.<sup>1</sup> Other solvents and chemicals were used as received.

**Preparation:** Co<sup>2+</sup>-doped and undoped CdSe nanowires were prepared by a solution-liquid-solid (SLS) approach<sup>2, 3</sup> where Bi nanoparticles were used as catalysts.<sup>4, 5</sup> The used parameters have been shown in Table S1. It should be noted that the samples with Code 2 – 5 were prepared without activation of Cd-precursor and the other samples were generated by activating Cd-precursor for 30 min. The synthesis procedure has been described using Code 1 as an example.

30.3 mg CdO, 3.04 g TOPO and 0.23 mL octanoic acid were added into a 50-mL three necked flask connected with a reflux condenser and a standard Schlenk line. This mixture was dried and degassed for 60 min at 100 °C under a vacuum. After the flask was filled back with N<sub>2</sub>, the temperature was increased to 300 °C to result in clear solution and then decreased to 280 °C. Meanwhile, Co-precursor stock solution was prepared by dissolving 0.44 g cobalt (II) stearate (CoSt<sub>2</sub>) in 17.0 mL phenyl ether (or octyl ether) in the presence of 0.5 mL octanoic acid. TOPSe (2.0 M) stock solution was obtained by dissolving 0.63 g Se powder in 4.0 mL TOP. Then a mixture of Bi nanoparticles (100 µL, 3.63 mM), TOPSe (100 µL, 2.0 M) and Co-precursor solution (1.0 mL, 0.04 M) was quickly injected into Cd-precursor solution at 280 °C and the temperature was dropped down to 260 °C. The solution reacted for 1 min and then cooled down to 80 °C, followed by the addition of 2 mL toluene to prevent the TOPO from solidifying. The resultant nanowires were separated from solution through high-speed

centrifugation (14800 rpm, 10 min) and washed with toluene for several times. The purified nanowires were re-dispersed in chloroform for characterization.

**Table S1.** Preparative parameters of Co<sup>2+</sup>-doped and undoped CdSe nanowires

| Code | CdO (mg) | TOPO (g) <sup>a</sup> | OCA (μL) <sup>b</sup> | TOPSe (μL) <sup>c</sup> | Bi-solution (μL) <sup>d</sup> | Co-solution (mL) <sup>e</sup> | T (°C) <sup>g</sup> | t (s) | D (nm)   | Co % |
|------|----------|-----------------------|-----------------------|-------------------------|-------------------------------|-------------------------------|---------------------|-------|----------|------|
| 1    | 30.3     | 3.04                  | 230                   | 100                     | 100                           | 1.0 <sup>f</sup>              | 280                 | 60    | 17.7±1.9 | 0.3  |
| 2    | 24.9     | 3.02                  | 230                   | 100                     | 100                           | 0                             | 250                 | 60    | 30.3±5.8 | -    |
| 3    | 24.8     | 3.08                  | 230                   | 100                     | 100                           | 0.25                          | 250                 | 60    | 19.0±7.4 | 0.08 |
| 4    | 24.5     | 3.01                  | 230                   | 100                     | 100                           | 0.50                          | 250                 | 60    | 12.1±3.1 | 0.14 |
| 5    | 24.7     | 3.02                  | 230                   | 100                     | 100                           | 1.0                           | 250                 | 60    | 14.6±4.7 | 0.25 |
| 6    | 25.2     | 3.02                  | 230                   | 100                     | 100                           | 0                             | 330                 | 30    | 13.0±2.6 | -    |
| 7    | 24.8     | 3.16                  | 230                   | 100                     | 100                           | 0.25                          | 330                 | 60    | 8.8±1.7  | 0.36 |
| 8    | 24.8     | 3.06                  | 230                   | 100                     | 100                           | 0.50                          | 330                 | 60    | 9.1±1.2  | 0.64 |
| 9    | 25.1     | 3.05                  | 230                   | 100                     | 120                           | 1.0                           | 330                 | 60    | 8.2±1.5  | 2.1  |

<sup>a</sup> TOPO: trioctylphosphine oxide; <sup>b</sup> OCA: octanoic acid; <sup>c</sup> Selenium concentration is 2.0 M; <sup>d</sup> Bi concentration is 3.63 mM; <sup>e</sup> CoSt<sub>2</sub> concentration is 41.8 mg/mL; <sup>f</sup> CoSt<sub>2</sub> concentration is 25.1 mg/mL; <sup>g</sup> injection temperature (T).

**Characterizations:**

Low-resolution TEM images were recorded on a JEOL 1011 electron microscope operating at an acceleration voltage of 100 kV. High-resolution images and energy-dispersive X-ray spectroscopy (EDAX) were collected on a Philips CM 300 UT microscope operating at an acceleration voltage of 200 kV. Energy-filtered TEM (EFTEM) maps were recorded on a FEI Tecnai G<sup>2</sup> F20 TEM installed with a Gatan GIF200 system and operated at an acceleration voltage of 200 kV. Powder X-ray diffraction (XRD) measurements were carried out on a Philips X'Pert-diffractometer at 45 kV and 40 mA using a mixture radiation of Cu K $\alpha$ 1 and K $\alpha$ 2 ( $\lambda_1 = 1.54056 \text{ \AA}$ ;  $\lambda_2 = 1.54439 \text{ \AA}$ , K $\alpha$ 2/ K $\alpha$ 1 = 0.5). Room-temperature absorption was measured with a Cary 50 UV-Vis spectrometer. Fluorescence and MCPL measurements were carried out using a laboratory-constructed spectrometer that has been described previously.<sup>6</sup> Fluorescence and MCPL signals were detected by a photomultiplier tube (RCA C31034) and lock-in amplifier system. Samples were illuminated in a 0.5 mm path-length quartz cell with 514 nm laser ( $\sim 30 \text{ mW/cm}^2$ ).

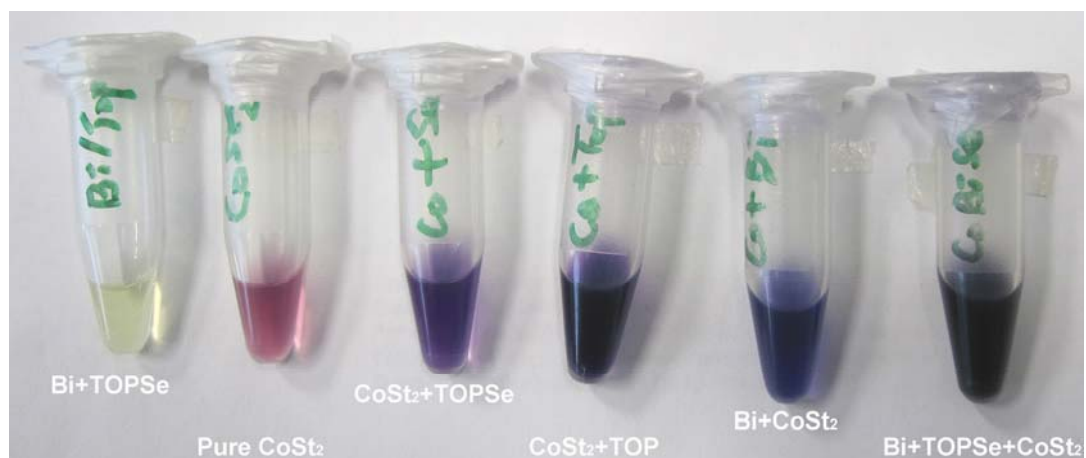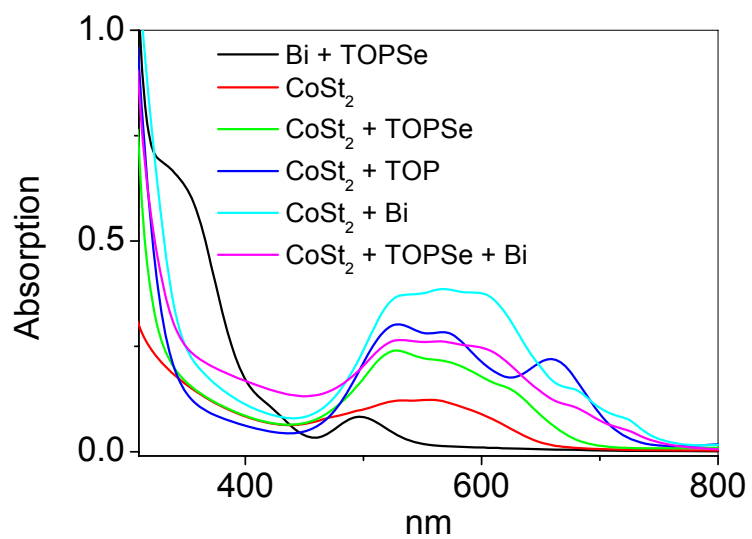

**Figure S1.** Digital image of precursor solutions and their UV-Vis absorption profiles.

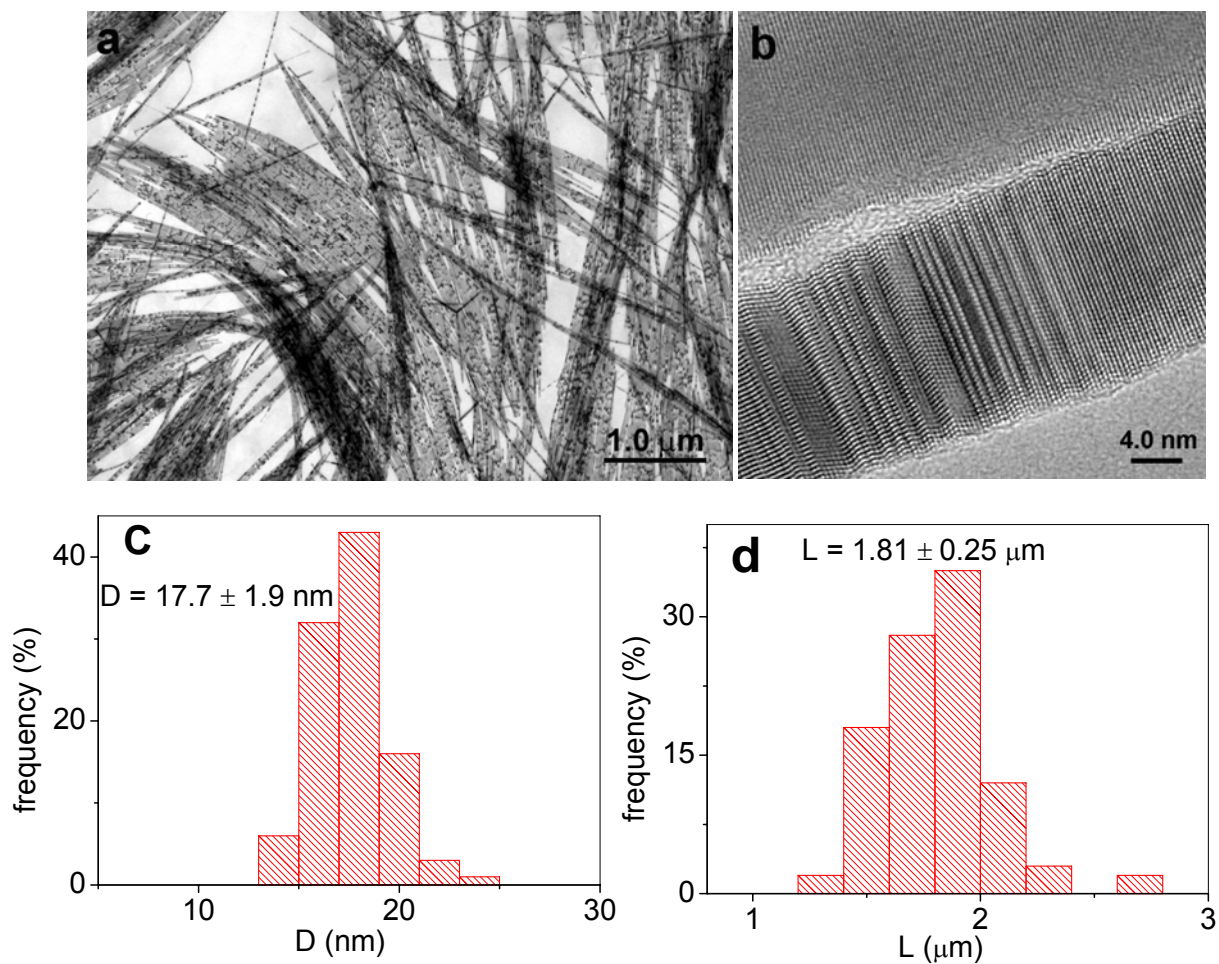

**Figure S2.** (a-b) low-resolution and high-resolution TEM images of  $\text{Co}^{2+}$ -doped CdSe nanowires; (c-d) diameter and length distribution of nanowires.

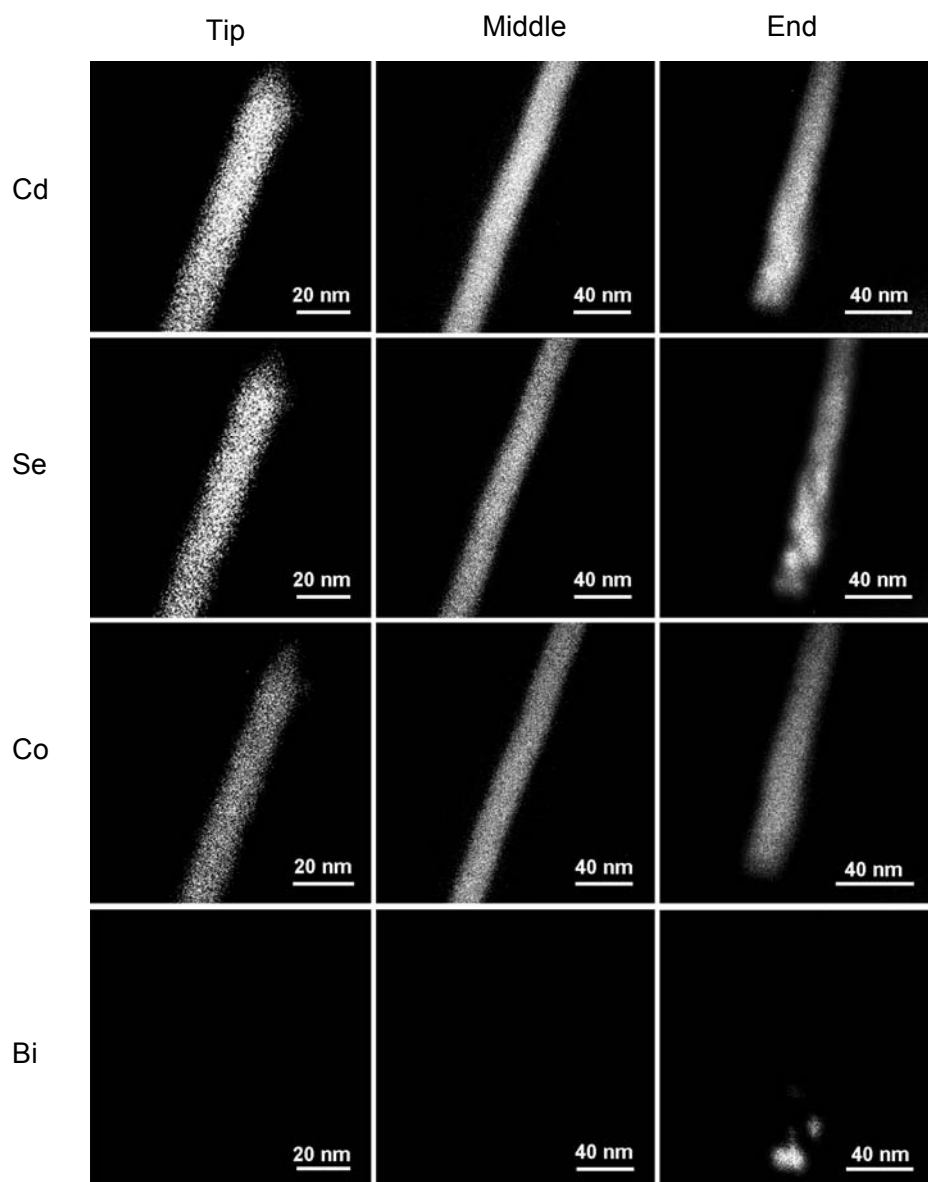

**Figure S3.** Energy filtered TEM images of different parts of  $\text{Co}^{2+}$ -doped CdSe nanowires.

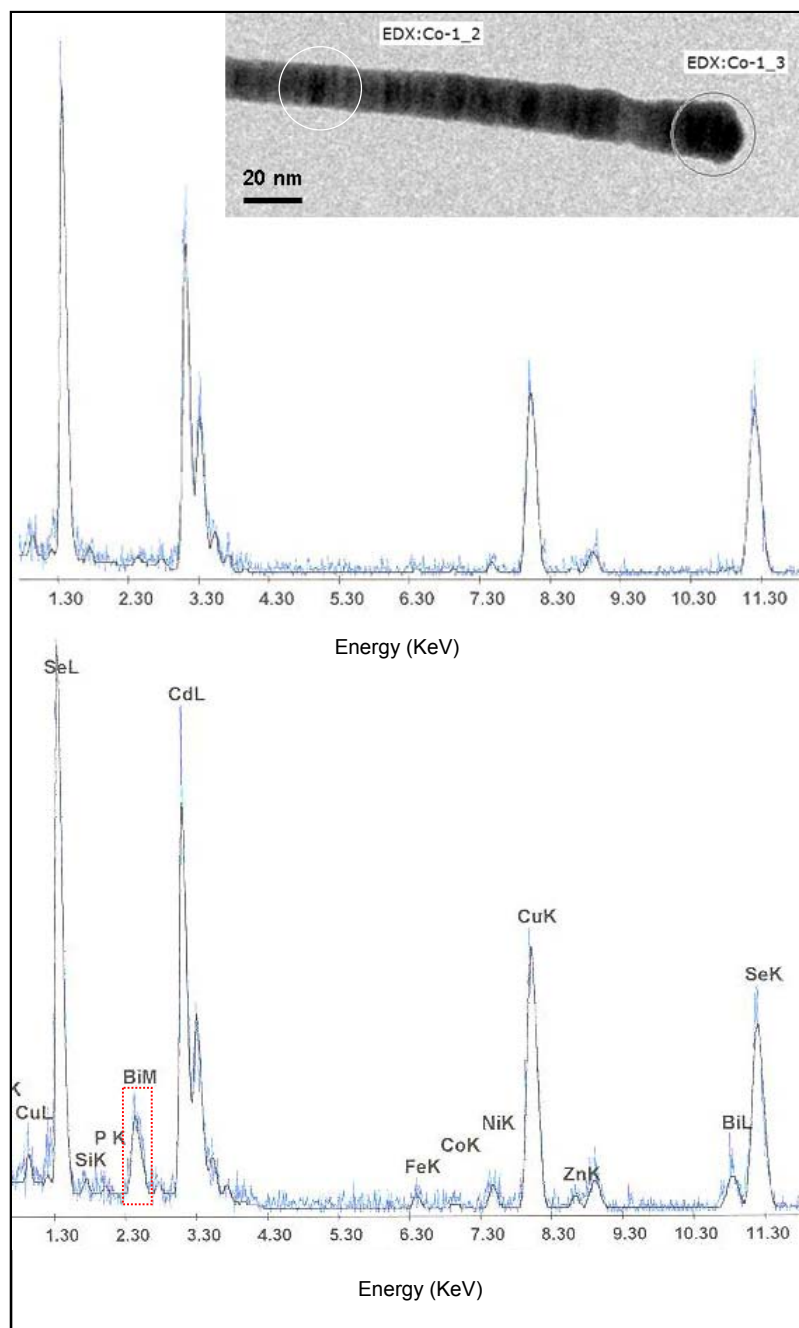

**Figure S4.** Typical EDAX spectra of middle- and catalyst part of  $\text{Co}^{2+}$ -doped CdSe nanowire. The red rectangle clearly shows the presence of Bi.



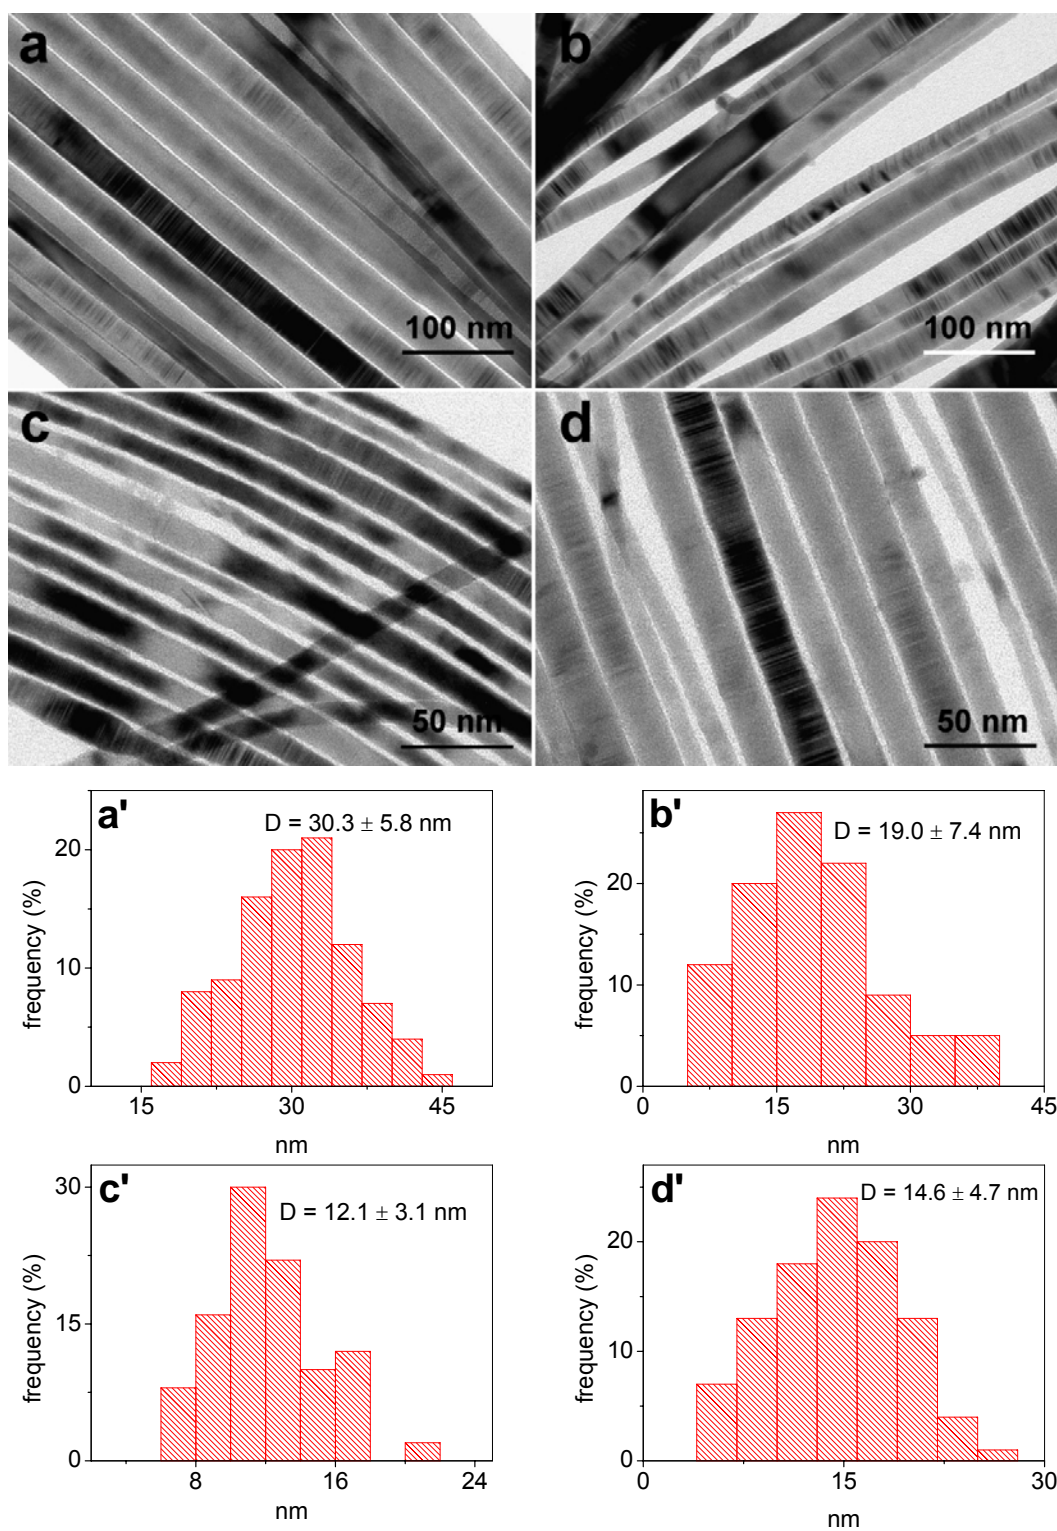

**Figure S5.** (a-d) TEM images and (a'-d') diameter distributions of  $\text{Co}_x\text{Cd}_{1-x}\text{Se}$  ( $x = 0, 0.08, 0.14$  and  $0.25$  %) nanowires prepared at  $250$  °C.

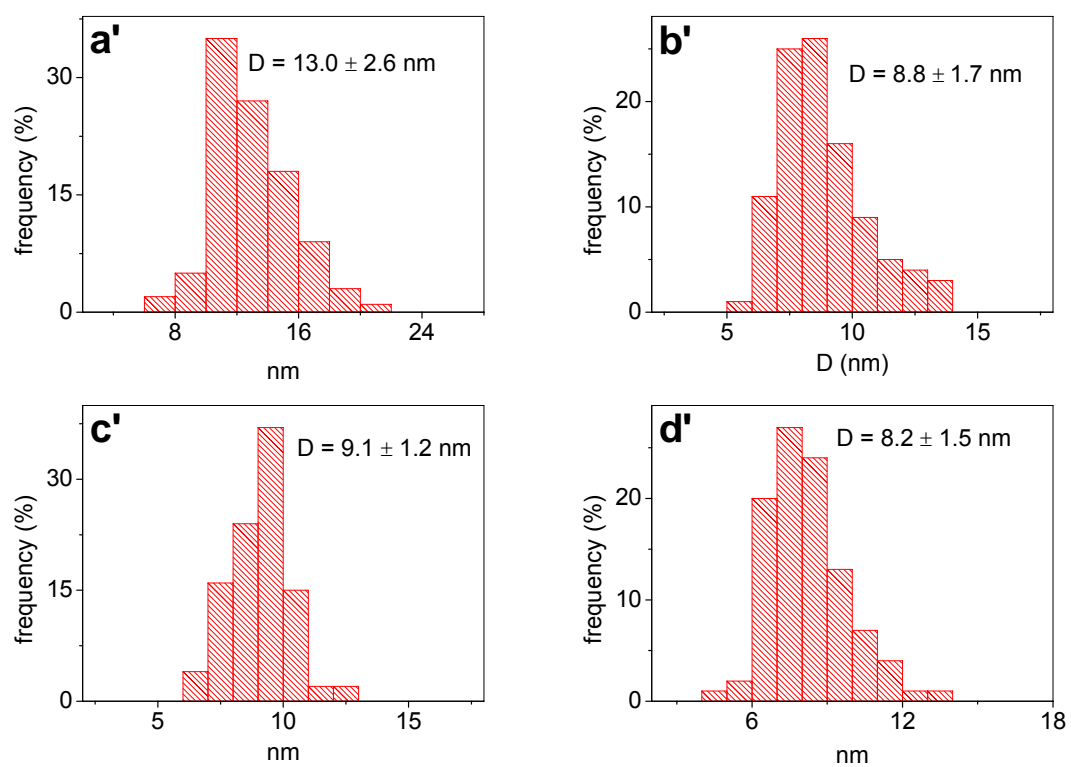

**Figure S6.** Diameter distributions of  $\text{Co}_x\text{Cd}_{1-x}\text{Se}$  ( $x = 0, 0.36, 0.64$  and  $2.1$  %) nanowires shown in Figure 2.

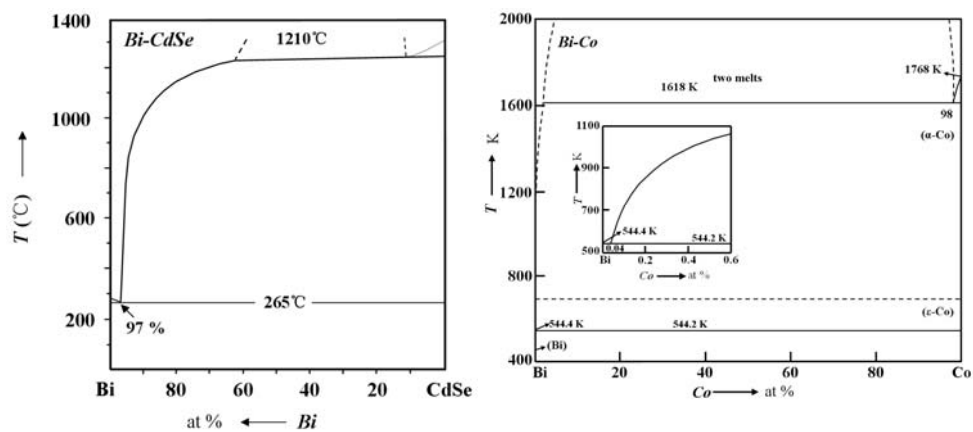

**Figure S7.** Bulk phase diagrams of Bi-CdSe and Bi-Co.

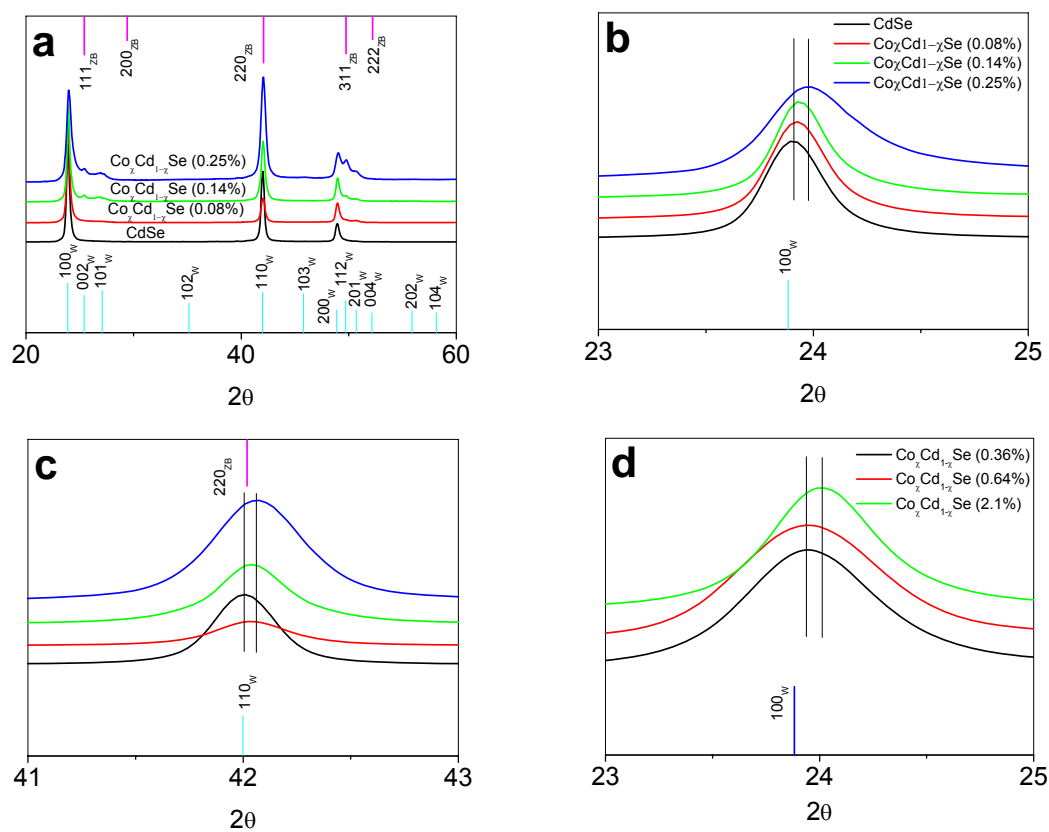

**Figure S8. (a-c)** XRD patterns of  $\text{Co}_x\text{Cd}_{1-x}\text{Se}$  ( $x = 0, 0.08, 0.14$  and  $0.25$  %) nanowires shown in Figure S5; **(d)** Magnified XRD patterns shown in Figure 3a

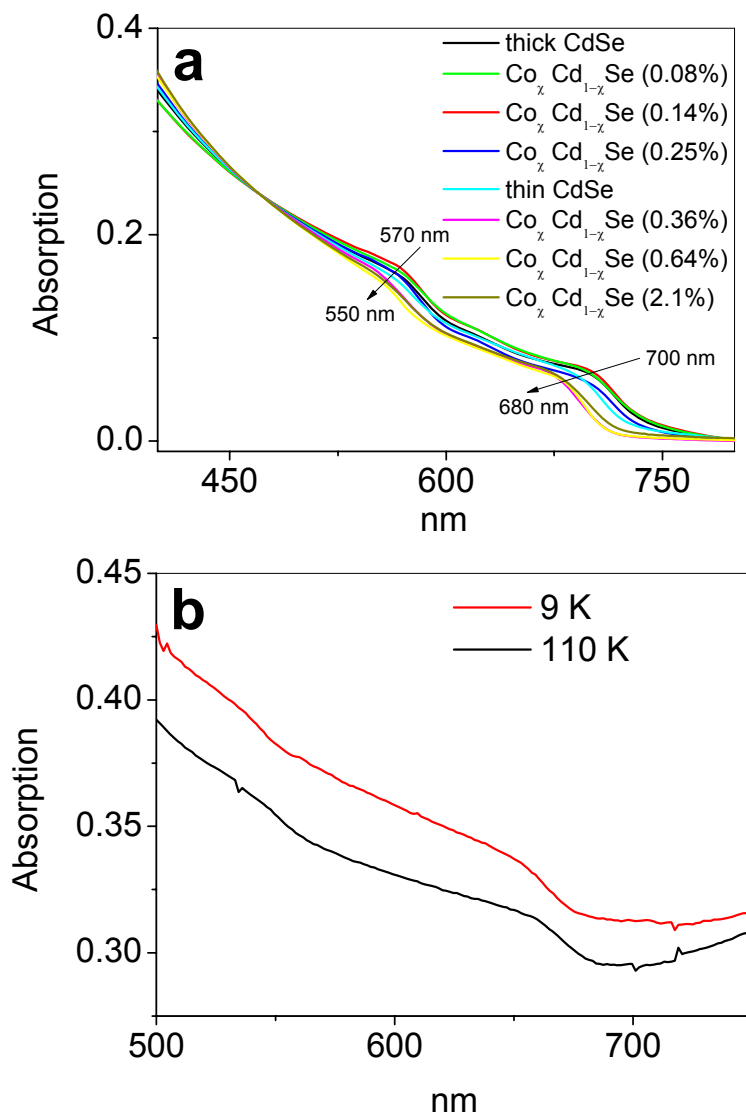

**Figure S9.** (a) Room temperature UV-Vis spectra of Co<sup>2+</sup>-doped CdSe nanowires shown in Figure S5 and Figure 2; (b) low-temperature absorption of nanowires shown in Figure 2c

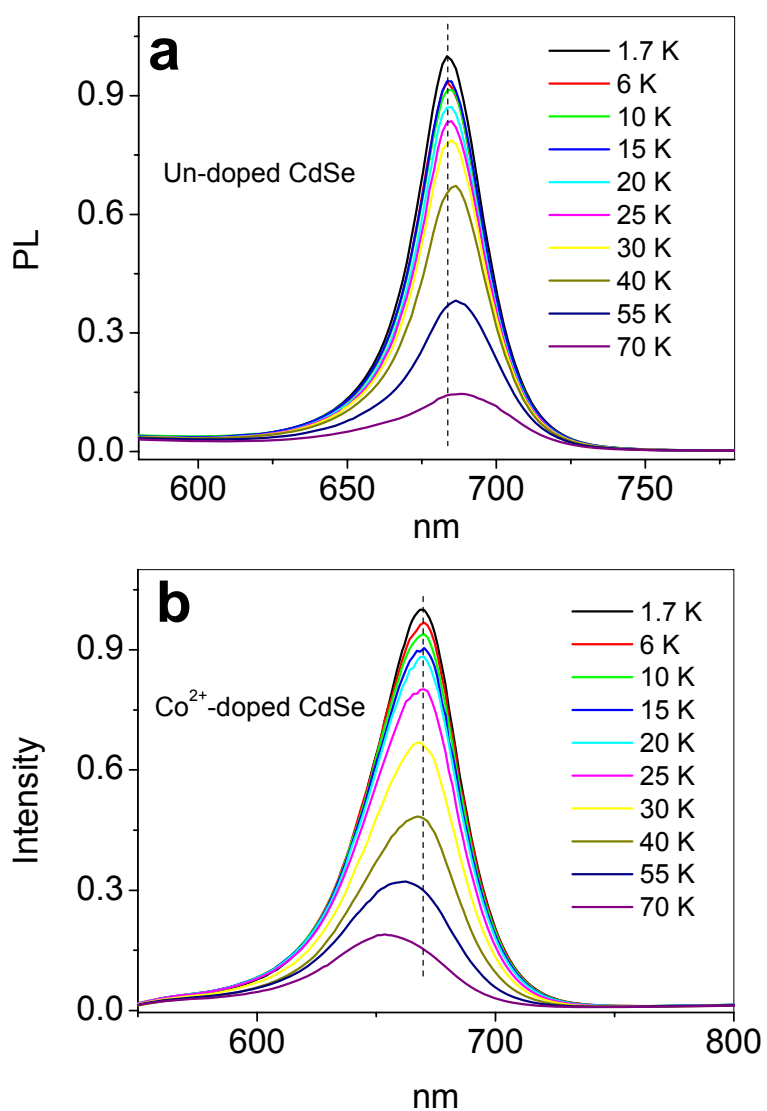

**Figure S10.** Photoluminescence temperature dependence of (a) undoped and (b) Co<sup>2+</sup>-doped CdSe nanowires measured in the presence of 5-T magnetic field. Their TEM images are shown in Figure 2a, c.

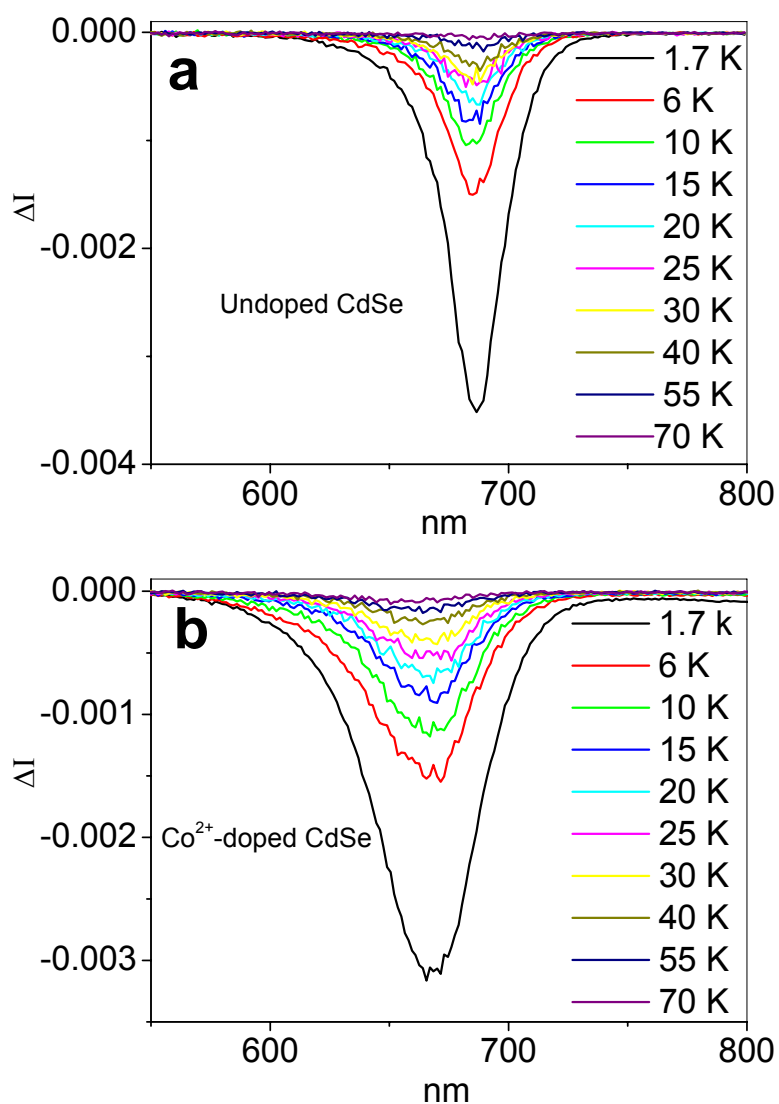

**Figure S11.** Temperature dependence of magnetic circularly polarized luminescence of undoped and  $\text{Co}^{2+}$ -doped CdSe nanowires measured in the presence of 5-T magnetic field.

## References

1. Z. Li, A. Kornowski, A. Myalitsin and A. Mews, *Small*, 2008, **4**, 1698-1702.
2. F. D. Wang, A. G. Dong, J. W. Sun, R. Tang, H. Yu and W. E. Buhro, *Inorg. Chem.*, 2006, **45**, 7511-7521.
3. M. Kuno, *Phys. Chem. Chem. Phys.*, 2008, **10**, 620-639.
4. Z. Li, Ö. Kurtulus, F. Nan, A. Myalitsin, Z. Wang, A. Kornowski, U. Pietsch and A. Mews, *Adv. Funct. Mater.*, 2009, **19**, 3650-3661.
5. Z. Li, L. N. Cheng, Q. Sun, Z. H. Zhu, M. J. Riley, M. Aljada, Z. X. Cheng, X. L. Wang, G. R. Hanson, S. Z. Qiao, S. C. Smith and G. Q. Lu, *Angew. Chem. Int. Ed.*, 2010, **49**, 2777-2781.
6. R. Stranger, L. Dubicki and E. Krausz, *Inorg. Chem.*, 1996, **35**, 4218-4226.
